## Corrigendum

### Corrigendum to: [Involvement of RNA granule proteins in meiotic silencing by unpaired DNA](#)

Hua Xiao, Michael M. Vierling, Rana F. Kennedy, Erin C. Boone, Logan M. Decker, Victor T. Sy, Jackson B. Haynes, Michelle A. Williams and Patrick K. T. Shiu

G3 Genes|Genomes|Genetics, Volume 11, 2021. <https://doi.org/10.1093/g3journal/jkab179>

In the originally published version of this manuscript (i.e., the corrected proof), a strain not used in the study (P26-35) was inadvertently included in Table 1. This strain has now been deleted.
